## ER-positive breast cancer cells are poised for RET-mediated endocrine resistance

Sachi Horibata,<sup>1,2</sup> Edward J. Rice,<sup>1</sup> Hui Zheng,<sup>1</sup> Lynne J. Anguish,<sup>1</sup> Scott A. Coonrod,<sup>1,3</sup> and Charles G. Danko<sup>1,3,4</sup>

<sup>1</sup>Baker Institute for Animal Health, College of Veterinary Medicine, Cornell University, Ithaca, NY 14853, USA

<sup>2</sup>Department of Molecular Medicine, College of Veterinary Medicine, Cornell University, Ithaca, NY 14853, USA

<sup>3</sup>Department of Biomedical Sciences, College of Veterinary Medicine, Cornell University, Ithaca, NY 14853, USA

<sup>4</sup>Lead Contact

### **Address correspondence to:**

Charles G. Danko, Ph.D.  
Baker Institute for Animal Health  
Cornell University  
Hungerford Hill Rd.  
Ithaca, NY 14853  
Phone: (607) 256-5620  
E-mail: dankoc@gmail.com

Scott A. Coonrod, Ph.D.  
Baker Institute for Animal Health  
Cornell University  
Hungerford Hill Rd.  
Ithaca, NY 14853  
Phone: (607) 256-5657  
E-mail: sac269@cornell.edu

1 **Abstract**

2 The RET tyrosine kinase signaling pathway is involved in the development of endocrine  
3 resistant ER+ breast cancer. However, the expression of the RET receptor itself has not been  
4 directly linked to clinical cases of resistance, suggesting that additional factors are involved. We  
5 show that both ER+ endocrine resistant and sensitive breast cancers have functional RET  
6 tyrosine kinase signaling pathway, but that endocrine sensitive breast cancer cells lack RET  
7 ligands that are necessary to drive endocrine resistance. Transcription of one RET ligand,  
8 GDNF, is necessary and sufficient to confer resistance in the ER+ MCF-7 cell line. In patients,  
9 RET ligand expression predicts responsiveness to endocrine therapies and correlates with  
10 survival. Collectively, our findings show that ER+ tumor cells are “poised” for RET mediated  
11 endocrine resistance, expressing all components of the RET signaling pathway, but endocrine  
12 sensitive cells lack high expression of RET ligands that are necessary to initiate the resistance  
13 phenotype.

## 14 **Introduction**

15 Estrogen receptor alpha (ER $\alpha$ ) is the major driver of ~75% of all breast cancers. Current  
16 therapies for patients with ER+ breast cancer are largely aimed at blocking the ER $\alpha$  signaling  
17 pathway. For example, tamoxifen blocks ER $\alpha$  function by competitively inhibiting E2/ER $\alpha$   
18 interactions<sup>1</sup> and fulvestrant promotes ubiquitin-mediated degradation of ER $\alpha$ <sup>2</sup>. Endocrine  
19 therapies are estimated to have reduced breast cancer mortality by 25-30%<sup>3</sup>. However, despite  
20 the widespread success of endocrine therapies, approximately 40-50% of breast cancer  
21 patients will either present with endocrine-resistant breast cancer at the time of diagnosis or  
22 progress into endocrine-resistant disease during the course of treatment<sup>4</sup>. Thus, there remains  
23 an urgent need to further elucidate the mechanism of endocrine resistance.

24 Numerous studies have now identified growth factor-stimulated signaling “escape”  
25 pathways that may provide mechanisms for cell growth and survival that are independent of E2.  
26 Foremost among these, the RET tyrosine kinase signaling pathway has been associated with  
27 endocrine resistance in both cell culture models as well as in primary tissues<sup>5-8</sup>. These studies  
28 have led to effective new biomarkers based on the downstream targets of RET signaling<sup>6</sup>.  
29 However, resistance by the RET signaling pathway has proven complex, relying in some cases  
30 of a functional ER $\alpha$  to drive resistance in aromatase inhibitor models<sup>6</sup>. Furthermore, genetic  
31 alterations in RET or its co-receptor, GFRA1, do not appear to be common in clinical cases,  
32 suggesting that additional factors are involved. A better understanding of the transcriptional  
33 targets of RET-mediated signaling pathways as well as understanding how these pathways  
34 crosstalk with ER $\alpha$  signaling will likely aid in the development of new predictive biomarkers and  
35 new targets for therapeutic intervention.

36 Here, we used Precision Run-On and Sequencing (PRO-seq) to comprehensively map  
37 RNA polymerase in tamoxifen-sensitive (TamS) and resistant (TamR) MCF-7 cells<sup>9</sup>. This  
38 approach is highly sensitive to immediate and transient transcriptional responses to stimuli,

39 allowing the discovery of target genes within minutes of activation [ref 12-16]. Moreover, active  
40 transcriptional regulatory elements (TREs) can be detected by this method, including both  
41 promoters and distal enhancers, as these elements display distinctive patterns of transcription  
42 that can aid in their identification<sup>10-15</sup>. Among the 527 genes and 1,452 TREs that differ in TamS  
43 and TamR MCF-7 cells, we identified glial cell line-derived neurotrophic factor (GDNF), a ligand  
44 of RET tyrosine kinase receptor, to be upregulated in TamR MCF-7 cells. Remarkably, we found  
45 that all of the proteins necessary to drive endocrine resistance through RET receptor signaling  
46 are expressed in TamS MCF-7 cells, with the exception of a single limiting protein, GDNF or any  
47 of the other RET ligands (GDNF, NRTN, ARTN, or PSPN). To test this model, we manipulated  
48 GDNF expression in MCF-7 cells and found that high GDNF expression is both necessary and  
49 sufficient for tamoxifen resistance in our MCF-7 cell model. Several lines of evidence suggest  
50 that RET ligands are the limiting reagent in clinical samples as well, including ample expression  
51 of RET and its co-receptors, but limiting expression of GDNF and the other RET ligands in  
52 primary tumors. Additionally, RET ligand expression is predictive of responsiveness to  
53 endocrine therapies in breast cancer patients. Taken together, our studies support a model in  
54 which tamoxifen sensitive and resistant cells are 'poised' for RET-mediated endocrine  
55 resistance by expressing RET and its co-receptor, but are limited by the abundance of RET  
56 ligands to drive a resistant phenotype.

## 57 Results

### 58 Transcriptional differences between endocrine sensitive and resistant MCF-7 cells.

59 Although MCF-7 cells are ER+ and usually require E2 for growth and proliferation, a subset of  
60 the heterogeneous MCF-7 cell population continues to grow in the presence of anti-estrogens  
61 such as tamoxifen<sup>9,16</sup>. We hypothesized that the resistant cells display a unique transcriptional  
62 program which can be used to identify factors that play a causative role in tamoxifen resistance.  
63 We used PRO-seq to map the location and orientation of RNA polymerase in two tamoxifen  
64 sensitive (TamS) and two *de novo* resistant (TamR) MCF-7 cell lines that were clonally derived  
65 from parental MCF-7 cells<sup>9</sup>. Consistent with the Gonzalez-Malerva study, we found that the  
66 TamS lines (TamS; B7<sup>TamS</sup> and C11<sup>TamS</sup>) were sensitive to as little as 1 nM of tamoxifen, while  
67 the TamR lines (TamR; G11<sup>TamR</sup> and H9<sup>TamR</sup>) were not affected at concentrations as high as 100  
68 nM (Fig. 1a). PRO-seq libraries were prepared from all four cell lines (Fig. 1b), as previously  
69 described<sup>17,18</sup>, and sequenced to a combined depth of 87 million uniquely mapped reads  
70 (Supplementary Table 1). We quantified the similarity of transcription in the MCF-7 cell  
71 subclones by comparing the Pol II abundance in annotated gene bodies. Unbiased hierarchical  
72 clustering grouped B7<sup>TamS</sup> and C11<sup>TamS</sup> TamS lines into a cluster and left G11<sup>TamR</sup> and H9<sup>TamR</sup>  
73 TamR lines as more distantly related outgroups (Fig. 1c). Although TamR cells clustered  
74 independently, all four MCF-7 clones are nevertheless remarkably highly correlated  
75 (Spearman's Rho > 0.95), suggesting that relatively few transcriptional changes are necessary  
76 to produce the tamoxifen resistance phenotype.

77 We identified 527 genes that are differentially transcribed in TamS and TamR MCF-7  
78 cells (1% FDR, DESeq2<sup>19</sup>), 341 of which were transcribed more highly in TamS and 186 more  
79 highly in TamR cell lines (Fig. 1d). Several of the differentially transcribed genes, including, for  
80 example, *PGR*, *GREB1*, *IGFBP5*, *HOXD13*, and *GDNF*, were identified in other models of  
81 endocrine resistance<sup>6,7,20-23</sup>, supporting our hypothesis that transcriptional changes in the MCF-  
82 7 model are informative about endocrine resistance.

83

84 **ER target genes are uniquely expressed in tamoxifen-sensitive MCF-7 cells.** To confirm  
85 that transcriptional changes detected using PRO-seq lead to differences in mRNA abundance,  
86 we validated transcriptional changes in *PGR* (Fig. 2a) and *GREB1* (Fig. 2b) between the B7<sup>TamS</sup>  
87 and G11<sup>TamR</sup> MCF-7 cells using qPCR (Fig. 2c and 2d). Many of the differentially transcribed  
88 genes are targets of ER $\alpha$  signaling, including *PGR*, *GREB1*, *NOS1AP*, and *ELOVL2*, (Fig. 1d)  
89 suggesting that changes between TamR and TamS MCF-7 cells can be explained in part by  
90 differences in the genomic actions of ER $\alpha$ . To test for an enrichment of ER $\alpha$  target genes, we  
91 used an independent GRO-seq dataset<sup>24</sup> to investigate whether immediate transcriptional  
92 changes following E2 treatment are correlated with genome-wide changes in TamS and TamR  
93 MCF-7 cells. We found that genes up-regulated by 40 minutes of E2 treatment tend to be  
94 transcribed more highly in TamS MCF-7 cells, and genes down-regulated by E2 are more highly  
95 transcribed in TamR cell lines (Fig. 2e). Thus, our data demonstrate global changes in the  
96 genomic actions of ER $\alpha$  in tamoxifen resistance in this MCF-7 model system.

97

98 **Distal enhancer activities correlate with tamoxifen resistance.** To elucidate the  
99 mechanisms responsible for changes in gene transcription during the development of tamoxifen  
100 resistance, we sought to discover the location of promoters and active distal enhancers,  
101 collectively called transcriptional regulatory elements (TREs). Nascent transcription is a  
102 sensitive way to identify groups of active enhancers<sup>11-14</sup>, and results in enhancer predictions  
103 that are highly similar to the canonical active enhancer mark, acetylation of histone 3 at lysine  
104 27 (H3K27ac)<sup>12,13,25</sup>. We used our dREG software package<sup>13</sup> followed by a novel peak  
105 refinement step that identifies the regions between divergent paused RNA polymerase (see  
106 Methods; manuscript in preparation) to identify 39,753 TREs that were active in either the TamS  
107 or TamR MCF-7 lines. TREs discovered using dREG were highly enriched for other active  
108 enhancer and promoter marks in MCF-7 cells, especially H3K27ac (Supplementary Fig. 1a), as

109 expected based on prior studies<sup>11–13,25</sup>. As an example, we selected a transcribed enhancer  
110 downstream of the *CCND1* gene for experimental validation using luciferase reporter gene  
111 assays, and confirmed luciferase activity in both B7<sup>TamS</sup> and G11<sup>TamR</sup> MCF-7 cells  
112 (Supplementary Fig. 1b and 1c).

113 We used the abundance of RNA polymerase recruited to each TRE as a proxy for its  
114 transcriptional activity in each MCF-7 subclone to identify differences in 1,452 TREs (812  
115 increased and 640 decreased) (1% FDR, DESeq2) between TamS and TamR MCF-7 cells.  
116 Differentially transcribed TREs were frequently located near differentially expressed genes and  
117 undergo correlated transcriptional changes between the four MCF-7 subclones. *GREB1* and  
118 *PGR*, for example, are each located near several TREs, including both promoters (green) and  
119 enhancers (gray), which undergo changes between TamR and TamS MCF-7 cells that are  
120 similar in direction and magnitude to those of the primary transcription unit which encodes the  
121 mRNA (Fig. 2a and 2b). These results are consistent with a broad correlation between changes  
122 at distal TREs and protein coding promoters<sup>11,24</sup>.

123 We hypothesized that differential transcription at TREs reflects differences in the binding  
124 of specific transcription factors that coordinate changes between TamS and TamR lines. We  
125 identified 12 clusters of motifs enriched in TREs that are differentially active in the TamS and  
126 TamR lines (Bonferroni corrected  $p < 0.001$ ; RTFBSDB<sup>26</sup>). The top scoring motif in this analysis  
127 corresponds to an estrogen response element (ERE), the canonical DNA binding sequence that  
128 recruits ER $\alpha$  to estrogen responsive enhancers (Fig. 2f). At least two of the top scoring motifs,  
129 those that were putatively bound by NFIA and HOX-family transcription factors (HOXC13  
130 shown), bind a transcription factor that was itself differentially expressed in TamS and TamR  
131 MCF-7 cells (Fig. 2f), consistent with our expectation that transcriptional changes of a  
132 transcription factor elicit secondary effects on the activity of TREs, and downstream effects on  
133 gene transcription.

134

135 **ER $\alpha$  signaling remains functional in endocrine-resistant lines.** *GREB1* and *PGR* play a  
136 critical role in ER $\alpha$  genomic activity in breast cancer cells<sup>22,27</sup>. Our observation that transcription  
137 of these ER $\alpha$  co-factors was lost in the resistant lines (Fig. 2a, 2b, 2c, and 2d) suggests that  
138 ER $\alpha$  signaling may be defective in the TamR cell lines. Consistent with this expectation, several  
139 analyses (i.e., the enrichment of ER $\alpha$  target genes and EREs, Fig. 1g and 1h) implicate global  
140 changes in the genomic actions of ER $\alpha$  during the development of tamoxifen resistance.  
141 However, these analyses are correlative and do not directly test the immediate responses to E2  
142 in TamR and TamS lines.

143 To directly test the hypothesis that the genomic actions of ER $\alpha$  are substantially altered  
144 in the TamR lines, we treated B7<sup>TamS</sup> and G11<sup>TamR</sup> MCF-7 cells for 40 minutes with either E2 or  
145 tamoxifen, and monitored transcriptional changes using PRO-seq. RNA polymerase abundance  
146 increased sharply at ER $\alpha$  ChIP-seq peaks<sup>28</sup> in B7<sup>TamS</sup> MCF-7 cells (Fig. 3a top) in response to  
147 E2, but not in response to tamoxifen, in agreement with our prior work<sup>11,29</sup>. Although we  
148 observed a muted effect of E2 on enhancers in G11<sup>TamR</sup> compared with B7<sup>TamS</sup>, increases in Pol  
149 II loading were observed in response to E2, but not tamoxifen (Fig. 3a bottom). These results  
150 demonstrate that E2 signaling pathway remains functional and able to affect gene transcription  
151 in a stimulus-dependent manner in TamR cells. We attribute the muted response in G11<sup>TamR</sup> to  
152 a 2.44-fold reduction in the abundance of ER $\alpha$  mRNA in G11<sup>TamR</sup> MCF-7 cells compared to the  
153 B7<sup>TamS</sup> MCF-7 cells (Fig. 3b). This muted effect explains the enrichment in E2 target genes, as  
154 well as the ERE motif enrichment, between TamS and TamR lines shown in Fig. 1 and 2.  
155 Nevertheless, the genomic actions of E2-liganded ER $\alpha$  remain functional in TamR MCF-7 cells.

156 Given that E2 signaling remains functional, but muted in the TamR line, we next tested  
157 whether ER $\alpha$  was required for the growth of our tamoxifen-resistant cells. We found that the  
158 viability of both G11<sup>TamR</sup> and H9<sup>TamR</sup> MCF-7 cells was largely unaffected by treatment with the  
159 ER degrader, fulvestrant (Fig. 3c). Therefore, endocrine resistance in G11<sup>TamR</sup> and H9<sup>TamR</sup>  
160 MCF-7 cells appears to occur independently of ER $\alpha$  signaling, suggesting that these TamR lines



161 are likely using an alternative pathway for cell survival and proliferation when grown in the  
162 presence of tamoxifen.

163  
164 **GDNF is necessary and sufficient to confer endocrine resistance in MCF-7 cells.** We next  
165 investigated pathways by which TamR lines may promote cell survival in the presence of  
166 endocrine therapies. Tyrosine kinase growth factor signaling pathways have been implicated in  
167 preclinical models of endocrine resistance<sup>5,7,30</sup>. RET is a cell surface receptor that elicits cell  
168 survival signals when bound by one of four RET ligands, GDNF, NRTN, ARTN, and PSPN<sup>31</sup>.  
169 One of these ligands, glial cell line-derived neurotrophic factor (GDNF), was among the most  
170 highly up-regulated genes in both G11<sup>TamR</sup> and H9<sup>TamR</sup> MCF-7 lines (Fig. 4a). We confirmed the  
171 transcriptional differences in *GDNF* between B7<sup>TamS</sup> and G11<sup>TamR</sup> MCF-7 cells using qPCR and  
172 found that GDNF mRNA levels were increased by ~25 fold in the resistant line (Fig. 4b). Thus  
173 both *GDNF* transcription and mRNA abundance correlate with endocrine resistance in MCF-7  
174 cells, suggesting that GDNF may contribute to the endocrine resistance phenotype.

175 We tested whether GDNF is casually involved in endocrine resistance by manipulating  
176 GDNF levels in our MCF-7 model. We first examined the effects of 10 ng/mL of recombinant  
177 GDNF protein on the growth of B7<sup>TamS</sup> cells in the presence of antiestrogens. Remarkably,  
178 GDNF completely rescued B7<sup>TamS</sup> MCF-7 cells when challenged with both tamoxifen (Fig. 4c)  
179 and fulvestrant (Supplementary Fig. 2a). Moreover, GDNF treatment without tamoxifen  
180 increased the proliferation rate of B7<sup>TamS</sup> MCF-7 cells by ~20% (Fig. 4c), suggesting that the  
181 growth pathways activated by GDNF can work independently of ER $\alpha$ . Next we tested whether  
182 GDNF was necessary to confer endocrine resistance in our model system by using short hairpin  
183 RNAs (shRNA) to knockdown GDNF in G11<sup>TamR</sup> MCF-7 cells. Results show that GDNF  
184 depletion (GDNF-KD) reduced *GDNF* mRNA levels by 57.38% (Fig. 4d) and that these cells  
185 were significantly more sensitive to tamoxifen treatment than G11 cells transfected with a  
186 scrambled control (Fig. 4e). Moreover, endocrine resistance could be restored to GDNF-KD

187 G11 cells by the addition of 5 ng/ mL recombinant GDNF protein (Fig. 4e), demonstrating that  
188 growth inhibition does not reflect an off-target effect of the *GDNF* shRNA. Taken together, these  
189 data demonstrate that *GDNF* plays a central and causal role in establishing endocrine  
190 resistance in G11<sup>TamR</sup> MCF-7 cells.

191

## 192 **Endocrine-sensitive ER+ breast cancer cells express RET transmembrane receptors.**

193 Having shown that *GDNF* expression promotes endocrine resistance in our MCF-7 cell model,  
194 we asked whether *GDNF* promotes resistance in patients as well. Increases in the expression  
195 of RET tyrosine kinase or its co-receptor GFR $\alpha$ 1 are thought to be involved in endocrine  
196 resistance<sup>5-7</sup>. However, RET is itself transcriptionally activated by ER $\alpha$  and is highly abundant in  
197 endocrine sensitive ER+ breast cancer cell models<sup>24</sup>. Analysis of mRNA-seq data from 1,177  
198 primary breast cancers in the cancer genome atlas (TCGA) revealed that the RET mRNA  
199 expression level was highest in ER+ breast cancer and correlates positively with the expression  
200 level of *ESR1* (ER $\alpha$ ) (Spearman's  $\rho = 0.51$ ,  $p < 2.2e-16$ ; Fig. 5a), suggesting that it is a direct  
201 transcriptional target of ER $\alpha$  *in vivo* as well. *GFRA1* mRNA encodes the GDNF co-receptor,  
202 GFR $\alpha$ 1, and, together with RET, activates RET-ligand signaling. Further analysis of the mRNA-  
203 seq data set found that *GFRA1* is also strongly correlated with *ESR1* mRNA in breast cancers  
204 (Spearman's  $\rho = 0.67$ ,  $p < 2.2e-16$ ; Supplementary Fig. 3a), suggesting that it is also a direct  
205 target of E2 signaling. In our MCF-7 endocrine resistance model, *GFRA1* transcription is 5-fold  
206 higher in TamS MCF-7 cells compared to TamR lines and *RET* transcription is not significantly  
207 different (Fig. 5b and 5c), demonstrating that neither factor is overexpressed in TamR MCF-7  
208 cells. Since both RET and GFRA1 are naturally high in ER+ breast cancer cells, and since high  
209 expression of these factors appears to be established in part by ER $\alpha$ , there must be other  
210 causes of endocrine resistance, both in cell models and *in vivo*.

211

212 **ER+ breast cancer cells and primary breast cancers that are sensitive to endocrine**  
213 **therapy lack GDNF to initiate resistance.** Our finding that recombinant GDNF was sufficient  
214 for endocrine resistance in B7<sup>TamS</sup> MCF-7 cells demonstrates that GDNF is a key limiting factor,  
215 the absence of which prevents TamS cells from developing a resistant phenotype. To extend  
216 this hypothesis to primary breast cancers, we sought to determine whether GDNF expression is  
217 normally low, such that it might limit RET pathway activation in most ER+ breast cancers.  
218 Indeed, GDNF expression was detectable in only 565 of 1,177 primary breast cancers (48%)  
219 analyzed by TCGA (Supplementary Fig. 3b). In principal, RET signaling may be activated by  
220 any of the four RET ligands (GDNF, NRTN, ARTN, and PSPN). However, only low levels of  
221 NRTN, ARTN, or their co-receptors were detected in primary breast tumors (Fig. 5d, 5e, and  
222 Supplementary Fig. 3b). Thus, we conclude that RET ligand expression is low compared with  
223 that of cell surface receptors, especially RET and GFR $\alpha$ 1, which are activated in part by ER $\alpha$ .  
224 This contrast between RET receptors and ligands supports a model in which the RET signaling  
225 pathway is 'poised' for endocrine resistance by expression of the receptors and that limiting  
226 levels of *GDNF* expression, or possibly other RET ligands, would ensure endocrine sensitivity in  
227 most tumors.

228         Next, we investigated whether high RET ligand expression in a subset of ER+ tumors  
229 may explain some cases of endocrine resistance. A careful examination of the GDNF  
230 expression distribution in TCGA breast cancers revealed a long tail, indicating high GDNF  
231 expression in a subset of cases in the TCGA dataset (Fig. 5e). Our hypothesis that GDNF  
232 expression limits RET-dependent endocrine resistance implies that these GDNF-high samples  
233 should be prone to endocrine resistance. We devised a simple non-parametric computational  
234 approach, which we call the 'outlier score', to quantify the degree to which GDNF is highly  
235 expressed based on the symmetry of the empirical probability density function (see Methods;  
236 Fig. 5e, blue line). Based on this score, we conservatively estimate that, of 925 ER+ breast

237 cancer patients in the TCGA dataset, 122 have high expression of at least one of the RET  
238 ligands (13%), 57 of which had high levels of GDNF (Fig. 5f).

239         If RET ligands are the limiting factor for endocrine resistance, as we propose here,  
240 cases included in this long distribution tail are those that are more likely to be resistant to  
241 endocrine therapies. To test this hypothesis, we analyzed expression microarray data collected  
242 prospectively by biopsies of patients that either respond, or do not respond, to the aromatase  
243 inhibitor letrozole<sup>32</sup>. A score comprised of the sum of the outlier scores from all four RET ligands  
244 is significantly higher in patients that do not respond to letrozole treatment ( $p= 0.016$ , one-sided  
245 Wilcoxon rank sum test; Fig. 5g). By contrast, there is no significant difference in RET  
246 expression in patients who respond or who do not respond to letrozole. These results suggest  
247 that RET ligand expression, but not RET itself, explain the differences in response to letrozole in  
248 this cohort of patients.

## 249 Discussion

250 In this study, we have used genomic tools to dissect how the GDNF-RET signaling pathway  
251 becomes activated in breast cancer cells to promote resistance to endocrine therapies.  
252 Systematic experimental manipulation of GDNF expression in TamS and TamR cell lines build  
253 on work described in previous studies<sup>5-8</sup> by providing the strongest support yet for this pathway  
254 playing a causal role in endocrine resistance in MCF-7 cells. Furthermore, analysis of clinical  
255 data points toward a model in which *RET* and *GFRA1* are actively transcribed in both endocrine  
256 sensitive MCF-7 cells and primary tumors, awaiting RET ligands to initiate resistance to  
257 endocrine therapies. This is, to our knowledge, the first study to suggest that expression of RET  
258 ligands themselves (including GDNF, ARTN, NRTN, and PSPN) are responsible for RET-  
259 mediated endocrine resistance. Overall, our study provides insights into how the RET signaling  
260 pathway become activated in ER+ breast cancers.

261 We are the first to propose that RET-mediated endocrine resistance occurs when ER+  
262 breast cancer cells express the RET ligand GDNF. Work on the RET signaling pathway in  
263 endocrine resistance has largely focused on amplifications or increases in the expression of  
264 RET or its co-receptor GFR $\alpha$ 1 in resistance to aromatase inhibitors<sup>6,7</sup>. However, RET  
265 expression is not significantly different in a cohort of patients resistant to the aromatase inhibitor  
266 letrozole (Fig. 5g), suggesting that other mechanisms may occur more commonly in patients  
267 than differences in the expression of RET itself. Indeed, we find that expression of RET and  
268 GFR $\alpha$ 1 are both highest in ER+ breast cancers, likely because of direct transcriptional activation  
269 of both genes by E2/ ER $\alpha$  (Fig. 5a and Supplementary Fig. 3a). Thus, we propose that ER+  
270 breast cancer cells are intrinsically 'poised' for RET-mediated endocrine resistance by the  
271 activation of RET cell-surface receptors, but lack expression of the ligand GDNF.

272 Based on these findings, we hypothesize that increased expression of any one of the  
273 four RET ligands, GDNF, ARTN, NRTN, or PSPN confers endocrine resistance on cells  
274 expressing the RET receptor. In support of this model, we demonstrate that the scoring system

275 we used, based on RET ligand overexpression in tumors, clearly separates breast cancer  
276 patients that respond to letrozole from those who do not (Fig. 5g). Several findings also strongly  
277 support the involvement of GDNF in endocrine resistance in our MCF-7 model, most notably the  
278 observations that GDNF rescues B7<sup>TamS</sup> lines and that GDNF knockdown in G11 cells restores  
279 sensitivity to tamoxifen (Fig. 4e). These observations are also supported by existing studies  
280 showing that another RET ligand, ARTN, contributes to tamoxifen resistance in MCF-7 cells<sup>33</sup>,  
281 extending and supporting the findings reported here. However, there is one RET ligand that is  
282 notably an outlier. PSPN does not appear to have any predictive value in patients, and thus may  
283 not play the same role in resistance as the other three RET ligands. This may reflect the  
284 extremely low expression of its co-receptor, *GFRA4*, in primary breast cancers (Supplementary  
285 Fig. 3b), preventing PSPN from having much effect on breast cancer cells. Taken together,  
286 these findings suggest that RET ligand expression, especially GDNF, ARTN, and NRTN,  
287 explain endocrine resistance in many cases.

288 A major question that remains unclear and of primary importance following our study is  
289 how RET ligand expression becomes activated in primary tumors. The abundance of GDNF  
290 mRNA appears to be extremely low in primary breast tumors analyzed by TCGA (Fig. 5d, 5e,  
291 and Supplementary Fig. 3b), which were in most cases collected before therapeutic  
292 intervention<sup>34,35</sup>. Notably, GDNF is not natively expressed in ER+ TamS MCF-7 cells but rather  
293 becomes activated following extended GDNF treatments. This may suggest that GDNF  
294 expression is initiated in tumors by another stimulus-dependent pathway or introduced by  
295 another cell type in the tumor microenvironment. Consistent with this, GDNF expression in  
296 tumors may require pro-inflammatory cytokines, such as tumor necrosis factor alpha (TNF $\alpha$ ), to  
297 be transcribed in breast cancer cells<sup>23</sup>. This finding may link poor survival outcomes in pro-  
298 inflammatory tumors<sup>36,37</sup> with GDNF-RET-mediated resistance to endocrine therapy.

299 Taken together, results reported in this study implicate RET ligands, including GDNF, as  
300 the primary determinant of endocrine resistance in both MCF-7 cells and patient samples (Fig.

301 6). Clinical studies targeting larger cohorts of patients beginning endocrine therapies will be  
302 required to fully validate our proposed mechanism of endocrine resistance.

## 303 **Methods**

304 **Cell lines and cell culture.** Tamoxifen-sensitive (TamS; B7<sup>TamS</sup> and C11<sup>TamS</sup>) and resistant  
305 (TamR; G11<sup>TamR</sup> and H9<sup>TamR</sup>) MCF-7 cells<sup>9</sup> were a gift from Dr. Joshua LaBaer. TamS cells were  
306 grown in Dulbecco's Modified Eagle Medium supplemented with 5% fetal bovine serum and 1%  
307 Penicillin Streptomycin, and TamR cells were grown in the same media supplemented with 1  
308  $\mu$ M tamoxifen. Tamoxifen used throughout in this paper is (Z)-4-Hydroxytamoxifen (4-OHT;  
309 Sigma-Aldrich; Cat# H7904).

310

311 **Cell viability assay.** Briefly,  $5 \times 10^3$  TamS and TamR cells were grown in 24-well TC-treated  
312 plates in their specific culture media. After allowing the cells to adhere to the plate for 24 hours,  
313 they were rinsed with PBS three times to remove any residual tamoxifen. The cells were treated  
314 with either increasing doses of tamoxifen (0 (vehicle control; EtOH),  $10^{-11}$ ,  $10^{-10}$ ,  $10^{-9}$ ,  $10^{-8}$ , or  $10^{-7}$   
315 M).

316 For setting up the rescue experiment with GDNF (PeproTech; Cat# 450-10),  $5 \times 10^3$   
317 B7<sup>TamS</sup> cells were grown in 24-well TC-treated plates in their specific culture media. After  
318 allowing the cells to adhere to the plate for 24 hours, they were treated with either EtOH  
319 (vehicle),  $10^{-7}$  M tamoxifen,  $10^{-7}$  M tamoxifen and 10 ng/mL GDNF, or 10 ng/mL GDNF treatment.  
320 The same set up was performed for  $10^{-7}$  M treatment of fulvestrant and using DMSO (vehicle) as  
321 a control.

322 After four days of endocrine treatment, cells were fixed with 4% paraformaldehyde and  
323 stained with 0.5% crystal violet solution made in 25% methanol. After washing away non-  
324 specific crystal violet stain with PBS, we took pictures of each plate and the crystal violet stain  
325 from the fixed cells was removed using 10% acetic acid. The absorbance was measured using  
326 the Tecan plate reader at OD<sub>595nm</sub>. Samples were normalized to the untreated control. Three  
327 biological replicates were performed and data are represented as mean  $\pm$  SEM.

328



329 **Cell culture set up and nuclei isolation.** TamS and TamR lines were grown in 150mm TC-  
330 treated culture dishes in their respective normal culture media. Cells were rinsed with PBS at  
331 least three times 24 hours after plating. Both the TamS and TamR cells were grown in  
332 Dulbecco's Modified Eagle Medium supplemented with 5% fetal bovine serum and 1% Penicillin  
333 Streptomycin for an additional three days until ~80% confluency in the absence of tamoxifen, in  
334 order to measure the difference between TamS and TamR cells pre-treatment.

335 Nuclei were isolated as described previously<sup>38</sup>. Briefly, cells were rinsed three times  
336 with ice-cold PBS and lysed using lysis buffer (10 mM Tris-HCl pH 7.4, 2 mM MgCl<sub>2</sub>, 3 mM  
337 CaCl<sub>2</sub>, 0.5% NP-40, 10% Glycerol, 1 mM DTT, 1X PIC (Roche; Cat# 11836153001), and 1 μl/10  
338 mL SUPERase-In (ThermoFisher; Cat# AM2694) dissolved in DEPC water). Cells were  
339 homogenized by gently pipetting at least 30 times and the nuclei were harvested by  
340 centrifugation at 1000 g for five minutes at 4°C. The isolated nuclei were washed twice with lysis  
341 buffer and were resuspended in 100 μL freezing buffer (50 mM Tris HCl pH 8.3, 5 mM MgCl<sub>2</sub>,  
342 40% Glycerol, 0.1 mM EDTA pH 8.0, and 4 U/mL SUPERase-In). The isolated nuclei were used  
343 for nuclear run-on and precision nuclear run-on sequencing (PRO-seq) library preparation.

344  
345 **Nuclear run-on and PRO-seq library preparation.** Nuclear run-on experiments were  
346 performed according to the methods described previously<sup>17,18</sup>. 1x10<sup>7</sup> nuclei in 100 μL freezing  
347 buffer were mixed with 100 μL of 2x nuclear run-on buffer (10 mM Tris-HCl pH 8.0, 5 mM MgCl<sub>2</sub>,  
348 1 mM DTT, 300 mM KCl, 50 μM biotin-11-ATP (Perkin Elmer; Cat# NEL544001EA), 50 μM  
349 biotin-11-GTP (Perkin Elmer; Cat# NEL545001EA), 50 μM biotin-11-CTP (Perkin Elmer Cat#  
350 NEL542001EA), 50 μM biotin-11-UTP (Perkin Elmer; Cat# NEL543001EA), 0.4 units/μL  
351 SUPERase In RNase Inhibitor (Life Technologies; Cat# AM2694), 1% Sarkosyl (Fisher  
352 Scientific; Cat# AC612075000). The mixture was incubated at 37 °C for five minutes. The biotin  
353 run-on reaction was stopped using Trizol (Life Technolgies; Cat# 15596-026), Trizol LS (Life

354 Technologies; Cat# 10296-010) and pelleted. The use of GlycoBlue (Ambion; Cat# AM9515) is  
355 recommended for higher pellet yield. RNA pellets were re-dissolved in DEPC water and  
356 denatured in 65 °C for 40 seconds and hydrolyzed in 0.2 N NaOH on ice for 10 minutes to have  
357 a hydrolyzed RNA length with that range ideally of 40 to 100 nts. Bead binding (NEB; Cat#  
358 S1421S) was performed to pull down nascent RNAs followed by 3' RNA adaptor ligation (NEB;  
359 Cat# M0204L). Another bead binding was performed followed by 5' de-capping using RppH  
360 (NEB; Cat# M0356S). 5' phosphorylation was performed followed by 5' adaptor ligation. The last  
361 bead binding was performed before generation of cDNA by reverse transcription. PRO-seq  
362 libraries were prepared according to manufacturers' protocol (Illumina) and were sequenced  
363 using the Illumina NextSeq500 sequencing.

364  
365 **Mapping of PRO-seq sequencing reads.** PRO-seq reads failing Illumina quality filters were  
366 removed. Adapters were trimmed from the 3' end of remaining reads using cutadapt with a 10%  
367 error rate<sup>39</sup>. Reads were mapped with BWA<sup>40</sup> to the human reference genome (hg19) and a  
368 single copy of the Pol I ribosomal RNA transcription unit (GenBank ID# U13369.1). The location  
369 of the RNA polymerase active site was represented by a single base that denotes the 3' end of  
370 the nascent RNA, which corresponded to the position on the 5' end of each sequenced read.  
371 Mapped reads were normalized to reads per kilobase per million mapped (RPKM) and  
372 converted to bigWig format using BedTools<sup>41</sup> and the bedGraphToBigWig program in the Kent  
373 Source software package<sup>42</sup>. Downstream data analysis was performed using the bigWig  
374 software package, available from: <https://github.com/andrelmartins/bigWig>. All data processing  
375 and visualization was done in the R statistical environment<sup>43</sup>.

376  
377 **Identification of active enhancers and promoters using dREG-HD.** We identified TREs  
378 using dREG<sup>13</sup>. Data collected from all four cell lines (TamR and TamS MCF-7 cells) was

379 combined to increase statistical power for the discovery of a superset of TREs active during any  
380 of the conditions examined.

381 The precise coordinates of TREs were refined using a strategy that we termed dREG-  
382 HD (available at <https://github.com/Danko-Lab/dREG.HD>; manuscript in preparation). Briefly,  
383 dREG-HD uses an epsilon-support vector regression (SVR) with a Gaussian kernel to map the  
384 distribution of PRO-seq reads to DNase-I signal intensities. Training was conducted on  
385 randomly chosen positions within dREG peaks in K562 cells (GEO ID# GSM1480327) extended  
386 by 200bp on either side. We selected the optimal set of features based on maximizing the  
387 Pearson correlation coefficient between the imputed and experimental DNase-I signal intensity  
388 over an independent validation set. Before DNase-I imputation, PRO-seq data was  
389 preprocessed by normalizing read counts to the sequencing depth and scaled such that the  
390 maximum value was within the 90<sup>th</sup> percentile of the training examples. To identify peaks, we  
391 smoothed the imputed DNase-I signal using a cubic spline and identified local maxima. We  
392 tuned the performance of the peak by empirically optimizing two free parameters that control the  
393 (1) smoothness of spline curve fitting, and (2) a threshold level on the intensity of the imputed  
394 DNase-I signal. Parameters were optimized to achieve <10% false discovery rates on a K562  
395 training dataset by a grid optimization over free parameters. We tested the optimized dREG-HD  
396 model (including both DNase-I imputation and peak calling) a GRO-seq dataset completely held  
397 out from model training and parameter optimization in on GM12878 lymphoblastoid cell lines  
398 (GSM1480326). Testing verified that dREG-HD identified transcribed DNase-I hypersensitive  
399 sites with 82% sensitivity at a 10% false discovery rate.

400 Additional genomic data in MCF-7 cells generated by the ENCODE project was  
401 downloaded from Gene Expression Omnibus. TREs discovered using dREG-HD were  
402 compared with ChIP-seq for H3K27ac and H3K4me3 (accession numbers: GSM945854 and  
403 GSM945269) and DNase-1 hypersensitivity (GSM945854).

404

405 **Differential expression analysis (DESeq2).** We compared treatment conditions or cell lines  
406 using gene annotations (GENCODE v19). We counted reads in the interval between 1,000 bp  
407 downstream of the annotated transcription start site to the end of the gene for comparisons  
408 between TamS and TamR cell clones. To quantify transcription at enhancers, we counted reads  
409 on both strands in the window covered by each dREG-HD site. Differential expression analysis  
410 was conducted using deSeq2<sup>19</sup> and differentially expressed genes were defined as those with a  
411 false discovery rate (FDR) less than 0.01.

412  
413 **Motif enrichment analysis.** Motif enrichment analyses were completed using the default set of  
414 1,964 human motifs in RTFBSDB<sup>26</sup> clustered into 622 maximally distinct DNA binding  
415 specificities (see ref Wang et. al. (2016)). We selected the motif to represent each cluster with  
416 canonical transcription factors that were most highly transcribed in MCF-7 cells. We fixed the  
417 motif cutoff log odds ratio of 7.5 (log e) in a sequence compared with a third-order Markov  
418 model as background. We identified motifs enriched in dREG-HD TREs that change  
419 transcription abundance between two conditions using Fisher's exact test with a Bonferroni  
420 correction for multiple hypothesis testing. TREs were compared to a background set of >1,500  
421 GC-content matched TREs that do not change transcription levels (<0.25 absolute difference in  
422 magnitude (log-2 scale) and  $p > 0.2$ ) using the enrichmentTest function in RTFBSDB<sup>26</sup>.

423  
424 **TCGA data analysis.** Processed and normalized breast cancer RNA-seq data was downloaded  
425 from the International Cancer Genome Consortium (ICGC) data portal website  
426 (<https://dcc.icgc.org>). Data profiling each gene was extracted using shell scripts. Processing and  
427 visualization was done in R.

428  
429 **Letrozole microarray reanalysis.** We reanalyzed Affymetrix U133A microarray data profiling  
430 mammary tumor biopsies before and after treatment with letrozole<sup>32</sup>. Miller et. al. (2012)

431 collected data from mammary tumor biopsies prior to letrozole treatment, 10-14 days following  
432 the start of treatment, and 90 days following the start of treatment. Samples were annotated as  
433 a “responder” (i.e., responds to letrozole treatment), a “non-responder” (i.e., no benefit from  
434 letrozole treatment), or “not assessable” (i.e., unknown). The Series Matrix Files were  
435 downloaded from Gene Expression Omnibus (GSE20181) and each gene of interest was  
436 extracted and processed into a text file. We used the following Affymetrix ID numbers  
437 221359\_at, 210683\_at, 210237\_at, 221373\_x\_at, 211421\_s\_at, and 201694\_s\_at to represent  
438 *GDNF*, *NRTN*, *ARTN*, *PSPN*, *RET*, and *EGR1*, respectively. We found no evidence of  
439 differences in RET or RET ligand expression across the three time points, and we therefore  
440 used the average expression of each RET ligand in each sample when comparing between  
441 responsive and non-responsive patients in order to decrease assay noise.

442 Outlier scores were designed to score the degree to which each sample fell within the  
443 tail of the distribution representing high expression levels of each RET ligand (as shown in Fig.  
444 4E). Because endocrine resistance could, in principal, be caused either by high expression of  
445 any individual RET ligand on its own, or by moderately high expression of multiple RET ligands  
446 in combination, we devised a data transformation and sum approach to score the degree to  
447 which all four of the RET ligands were highly expressed in each sample. In our data  
448 transformation, expression levels were centered by the median value and scaled based on the  
449 lower tail of the expression distribution (between quartile 0 and 50). This approach is similar in  
450 concept to a Z-score transform, but uses the lower tail to estimate the variance in order to avoid  
451 having high expression levels, which we hypothesize here may contribute to endocrine  
452 resistance, from contributing to the denominator used to standardize the distribution of each  
453 RET ligand. After transforming scores from all four RET ligands separately, we took the sum of  
454 the scores to represent our final ‘outlier score’. Because our hypothesis specifically predicted an  
455 increase in the RET ligand score to correlate with letrozole resistance, and because the number  
456 of patients was small, we designed the analysis to use a one-tailed Wilcoxon rank sum test.

457 However, in practice, using a two-tailed Wilcoxon rank sum test did not change the results of  
458 our analysis. Data was processed and visualization was completed using R.

459

460 **RNA isolation and quantitative real-time PCR.** RNA was purified using an RNeasy Kit  
461 (Qiagen; Cat# 74104) and 1µg of purified RNA was reverse-transcribed using a High Capacity  
462 RNA-to-cDNA kit (Applied Biosystems; Cat# 4387406) according to the manufacturers'  
463 protocols. Real-time quantitative PCR analysis was performed using the following primers:  
464 *ACTB* Forward (5'-CCAACCGCGAGAAGATGA-3') and Reverse (5'-  
465 CCAGAGGCGTACAGGGATAG-3'); *PGR* Forward (5'-GTCAGGCTGGCATGGTCCTT-3') and  
466 Reverse (5'-GCTGTGGGAGAGCAACAGCA-3'); *GREB1* Forward (5'-  
467 GTGGTAGCCGAGTGGACAAT-3') and Reverse (5'-ATTTGTTTCCAGCCCTCCTT-3')<sup>44</sup>; *GDNF*  
468 Forward (5'- TCTGGGCTATGAAACCAAGGA-3') and Reverse (5'-  
469 GTCTCAGCTGCATCGCAAGA-3')<sup>45</sup>; and Power SYBR Green PCR Master Mix (Applied  
470 Biosystems; Cat#4367659). The samples were normalized to β-actin. At least three biological  
471 replicates were performed and data are presented as mean ± SEM. All statistical analyses for  
472 qPCR were performed using GraphPad Prism. Groups were compared using a two-tailed  
473 unpaired Student's t-test.

474

475 **Generation of GDNF knockdown G11 cells.** *GDNF* expression was stably knocked down in  
476 G11<sup>TamR</sup> cells by transduction with lentivirus expressing either a shRNA scrambled control or  
477 *GDNF* shRNA. Mission shRNA lentivirus plasmids for control shRNA (Cat# SHC002) and *GDNF*  
478 shRNA (Cat# SHCLND-NM\_000514) from Sigma-Aldrich were used. Specifically, 1.5 µg  
479 pLKO.1 shRNA plasmid (Addgene; Plasmid #1864), 0.5 µg psPAX2 packaging plasmid  
480 (Addgene; Plasmid #12260), and 0.25 µg pMD2.G envelope plasmid were used for packaging  
481 (Addgene; Plasmid #12259). The lentiviruses were generated and transduced according to the  
482 manufacturer's instructions (Sigma-Aldrich). Clones were selected in 2 µg/ml of puromycin.

483

484 **Cell proliferation assay.** Approximately  $1 \times 10^6$  G11-scrambled (G11-SCR) and G11-GDNF-  
485 knockdown (G11-GDNF-KD) cells were plated in T25 TC-flask. The cells were grown in either 0,  
486 1 or 10  $\mu$ M tamoxifen in the presence or absence of 5 ng/mL GDNF for 7 days. The cell number  
487 was counted for quantification and was normalized to the untreated group. Three biological  
488 replicates were performed.

489

490 **Statistical analysis.** Statistical parameters include the exact number of biological replicates (n),  
491 standard error of the mean (mean  $\pm$  SEM), and statistical significance are reported in the figure  
492 legends. Data are reported statistically significant when  $p < 0.05$  by two-tailed Student's t-test.  
493 In figures, asterisks and pound signs denote statistical significance as calculated by Student's t-  
494 test. Specific p-values are indicated in the figure legends. Statistical analysis was performed  
495 using GraphPad PRISM 6.

496

#### 497 **Acknowledgements**

498 We thank X. Yao, L. Lan, as well as all members of the Danko and Coonrod labs for valuable  
499 insights and discussions. We also thank G. Leiman for edits and J. Lewis for input on the  
500 manuscript draft. Work in this publication was supported by NHGRI (National Human Genome  
501 Research Institute) grants from the US National Institutes of Health under award number R01  
502 HG009309-01 to CGD. The content is solely the responsibility of the authors and does not  
503 necessarily represent the official views of the US National Institutes of Health.

504

#### 505 **Author contributions**

506 The project was conceived by CGD, SAC, and SH. All cell culture and molecular experiments  
507 were done by SH, HZ, and LJA. PRO-seq experiments were conducted by EJR and SH.  
508 Genomic data was analyzed by CGD and SH. Data collection, experiments, and analysis was

509 supervised jointly by CGD and SAC. The paper was written by SH, CGD, and SAC with input  
510 from all authors.

511

### 512 **Competing financial interests**

513 The authors declare no competing financial interests.

514

### 515 **Data availability**

516 Raw data files for the PRO-seq analysis have been deposited in Gene Expression Omnibus  
517 under Accession Number GSE93229. This study can be viewed before official release at:

518 <https://www.ncbi.nlm.nih.gov/geo/query/acc.cgi?token=cpmbkeuyxxmjldai&acc=GSE93229>.

519 Software and scripts used in all analyses are publicly available without restriction on GitHub at

520 <https://github.com/Danko-Lab/mcf7tamres>. At the time of submission, the most recent commit

521 was version number: 855156ad07c042c88089cb4f31bf9d544487a1b2.

522



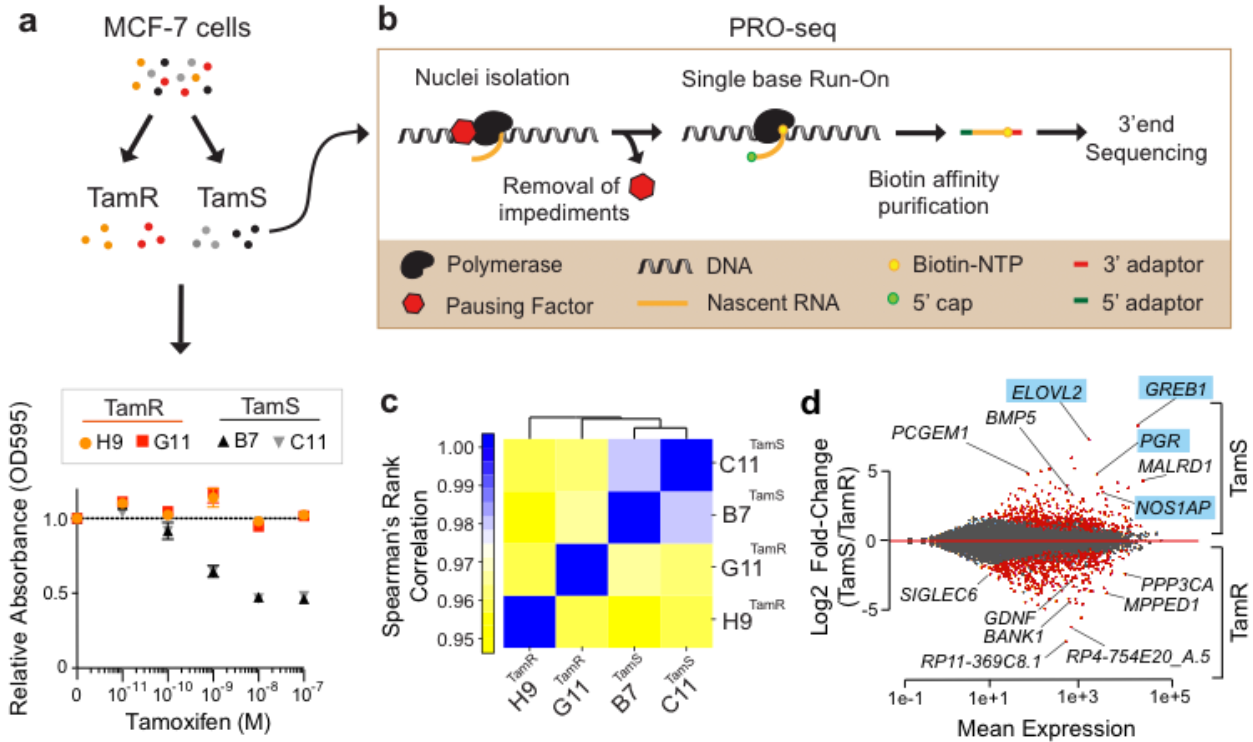

523

524 **Figure 1. PRO-seq provides a genome-wide location of active RNA polymerase.** (a) Cell  
 525 viability of tamoxifen sensitive (TamS; B7<sup>TamS</sup> and C11<sup>TamS</sup>) and resistant (TamR; G11<sup>TamR</sup> and  
 526 H9<sup>TamR</sup>) MCF-7 cells upon treatment with 0 (vehicle; EtOH), 10<sup>-11</sup>, 10<sup>-10</sup>, 10<sup>-9</sup>, 10<sup>-8</sup>, or 10<sup>-7</sup> M of  
 527 tamoxifen for 4 days. Data are represented as mean ± SEM (n=3). (b) Experimental setup for  
 528 PRO-seq. PRO-seq libraries were prepared from all four cell lines grown in the absence of  
 529 tamoxifen for 3 days. (c) Spearman's rank correlation of RNA polymerase abundance in the  
 530 gene bodies (+1000 bp to the annotation end) of TamS and TamR cell lines. (d) MA plot  
 531 showing significantly changed genes (red) that are higher in TamS (top) or TamR (bottom)  
 532 MCF-7 lines. Genes highlighted in the plots which are ERα targets are highlighted in blue.

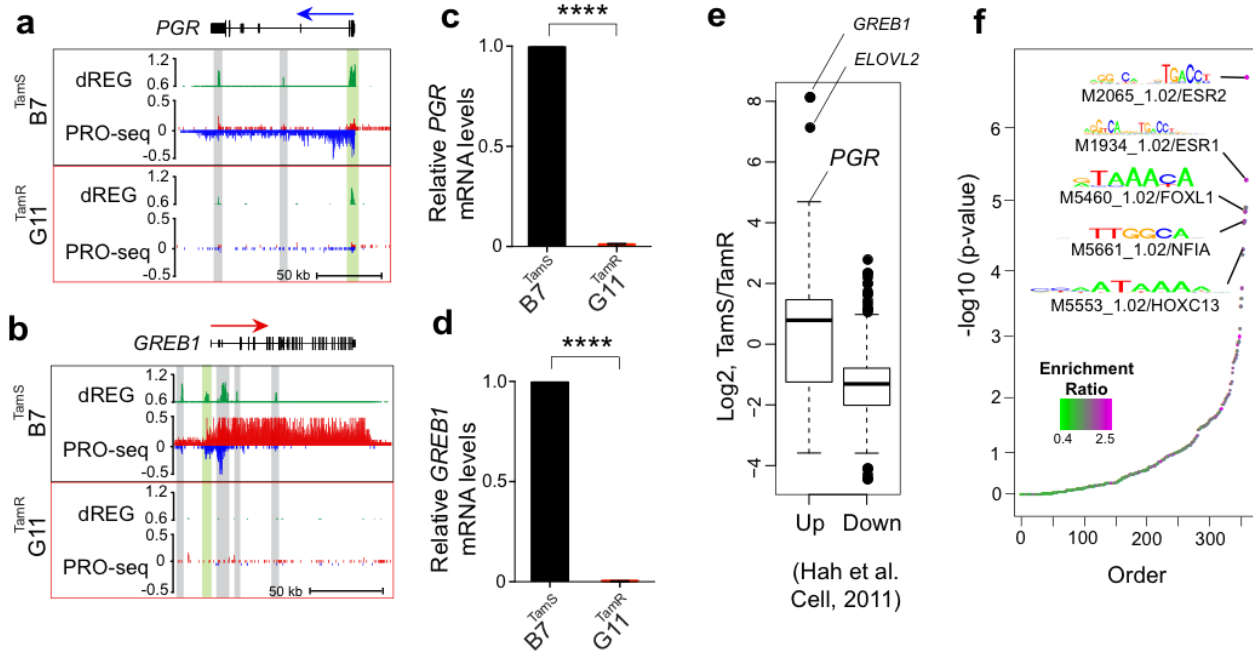

533  
534

535 **Figure 2. ER target genes are uniquely expressed in TamS cells.** (a-b) Transcription near  
536 the *PGR* (a) and *GREB1* (b) loci in  $B7^{TamS}$  and  $G11^{TamR}$  cells. PRO-seq densities on the sense  
537 and anti-sense strand are shown in red and blue, respectively. dREG scores are shown in green.  
538 Enhancers and promoters are shown in grey and light green shading, respectively. Arrows  
539 indicate the direction of gene annotations. (c-d) *PGR* (c) and *GREB1* (d) mRNA expression  
540 levels in  $B7^{TamS}$  and  $G11^{TamR}$  cells. Data are represented as mean  $\pm$  SEM ( $n=3$  for *PGR*;  $n=4$   
541 for *GREB1*). \*\*\*\*  $p < 0.0001$ .  $G11^{TamR}$  is normalized to  $B7^{TamS}$ . (e) Boxplots represent fold-  
542 change between  $TamS$  and  $TamR$  of genes that are either up- or down-regulated following 40  
543 minutes of estrogen (E2) in Hah et al. (2011). Spearman's  $Rho=0.185$ ,  $p < 2.2e-16$ . (f) Motifs  
544 enriched in TREs that have different amounts of RNA polymerase between  $TamS$  and  $TamR$   
545 cells compared with TREs that have consistent levels.

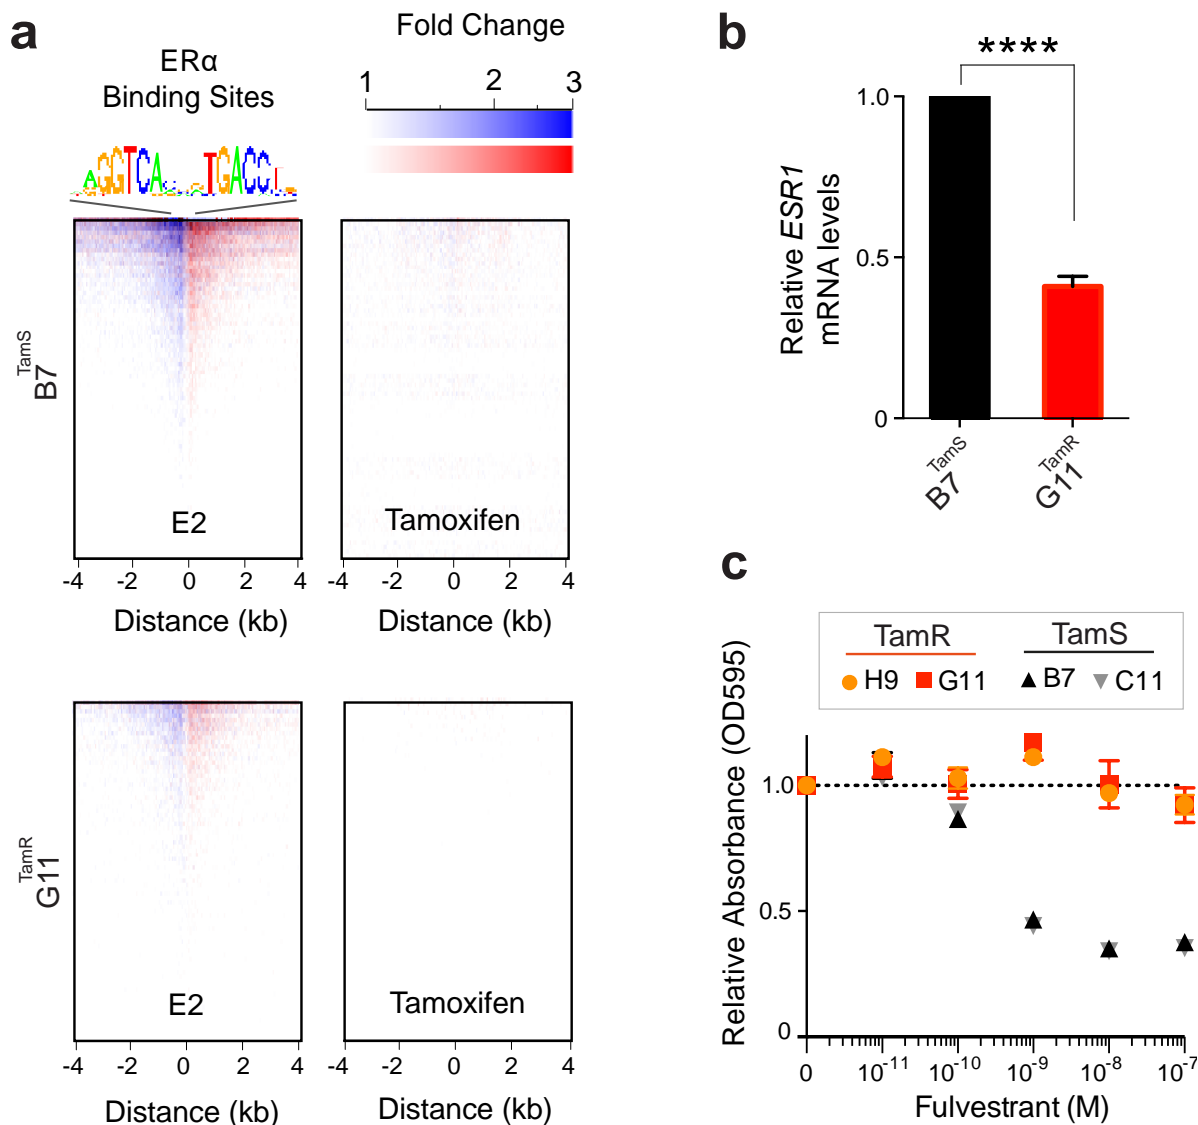

546  
547  
548  
549  
550  
551  
552  
553  
554

**Figure 3. Tamoxifen resistant lines have functional ER $\alpha$  signaling.** (a) Heatmap of changes in RNA polymerase abundance following 40 minutes of E2 or tamoxifen treatment near ER $\alpha$  bindings sites in B7<sup>TamS</sup> and G11<sup>TamR</sup> cells. (b) *ESR1* mRNA expression levels in B7<sup>TamS</sup> and G11<sup>TamR</sup> cells. Data are represented as mean  $\pm$  SEM (n=3). \*\*\*\* p < 0.0001. (c) Cell viability of TamS and TamR cells upon treatment with 0 (vehicle; DMSO), 10<sup>-11</sup>, 10<sup>-10</sup>, 10<sup>-9</sup>, 10<sup>-8</sup>, or 10<sup>-7</sup> M fulvestrant (ER degrader) for 4 days. Data are represented as mean  $\pm$  SEM (n=3).

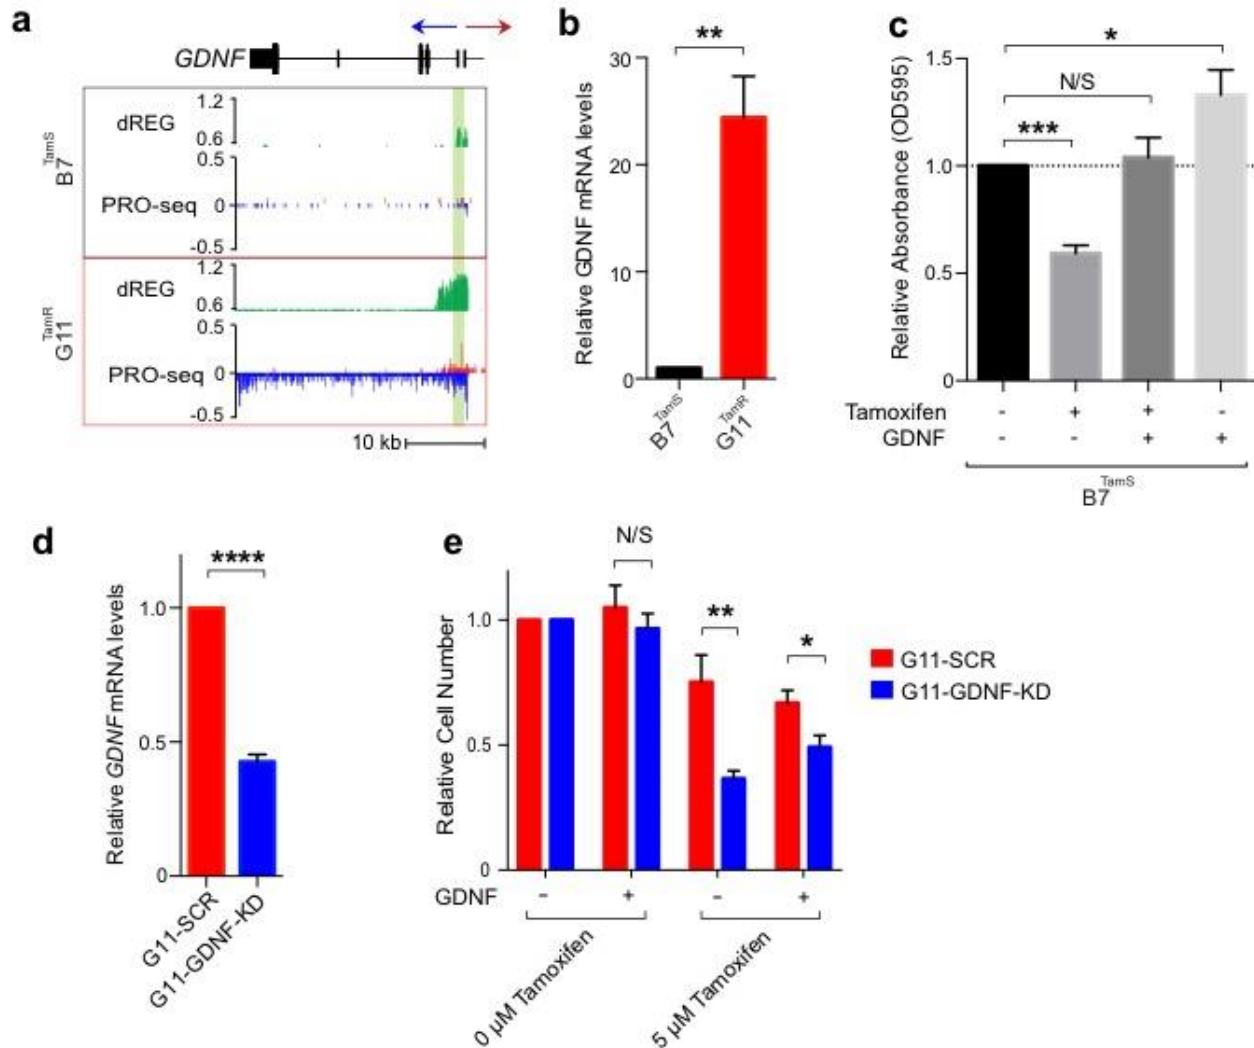

555  
556  
557  
558  
559  
560  
561  
562  
563  
564  
565  
566  
567  
568  
569

**Figure 4. *GDNF* is responsible for tamoxifen resistance in MCF-7 cells.** (a) Transcription near the *GDNF* locus in B7<sup>TamS</sup> and G11<sup>TamR</sup> cells. PRO-seq densities on sense strand and anti-sense strand are shown in red and blue, respectively. dREG scores are shown in green. The region near the *GDNF* promoter is shown in light green shading. Arrow indicates the direction of gene annotations. (b) *GDNF* mRNA expression levels in B7<sup>TamS</sup> and G11<sup>TamR</sup> cells. Data are represented as mean  $\pm$  SEM (n=3). \*\* p < 0.005. (c) Cell viability of B7<sup>TamS</sup> cells in the presence or absence of 10 ng/ml GDNF and/or 100 mM tamoxifen for 4 days. Data are represented as mean  $\pm$  SEM (n=3). \* p < 0.05, \*\*\* p < 0.0005. (d) *GDNF* mRNA expression levels in G11<sup>TamR</sup> scrambled (SCR) and G11<sup>TamR</sup> GDNF knockdown (GDNF-KD) cells. Data are represented as mean  $\pm$  SEM (n=3). \*\*\*\* p < 0.0001. (e) Relative cell number of G11<sup>TamR</sup> scrambled (SCR) and G11<sup>TamR</sup> GDNF knockdown (GDNF-KD) cells after 4 days without or with 1  $\mu$ M tamoxifen and/or 5 ng/ml GDNF treatment. Data are represented as mean  $\pm$  SEM (n=9). \* p < 0.05, \*\* p < 0.005.

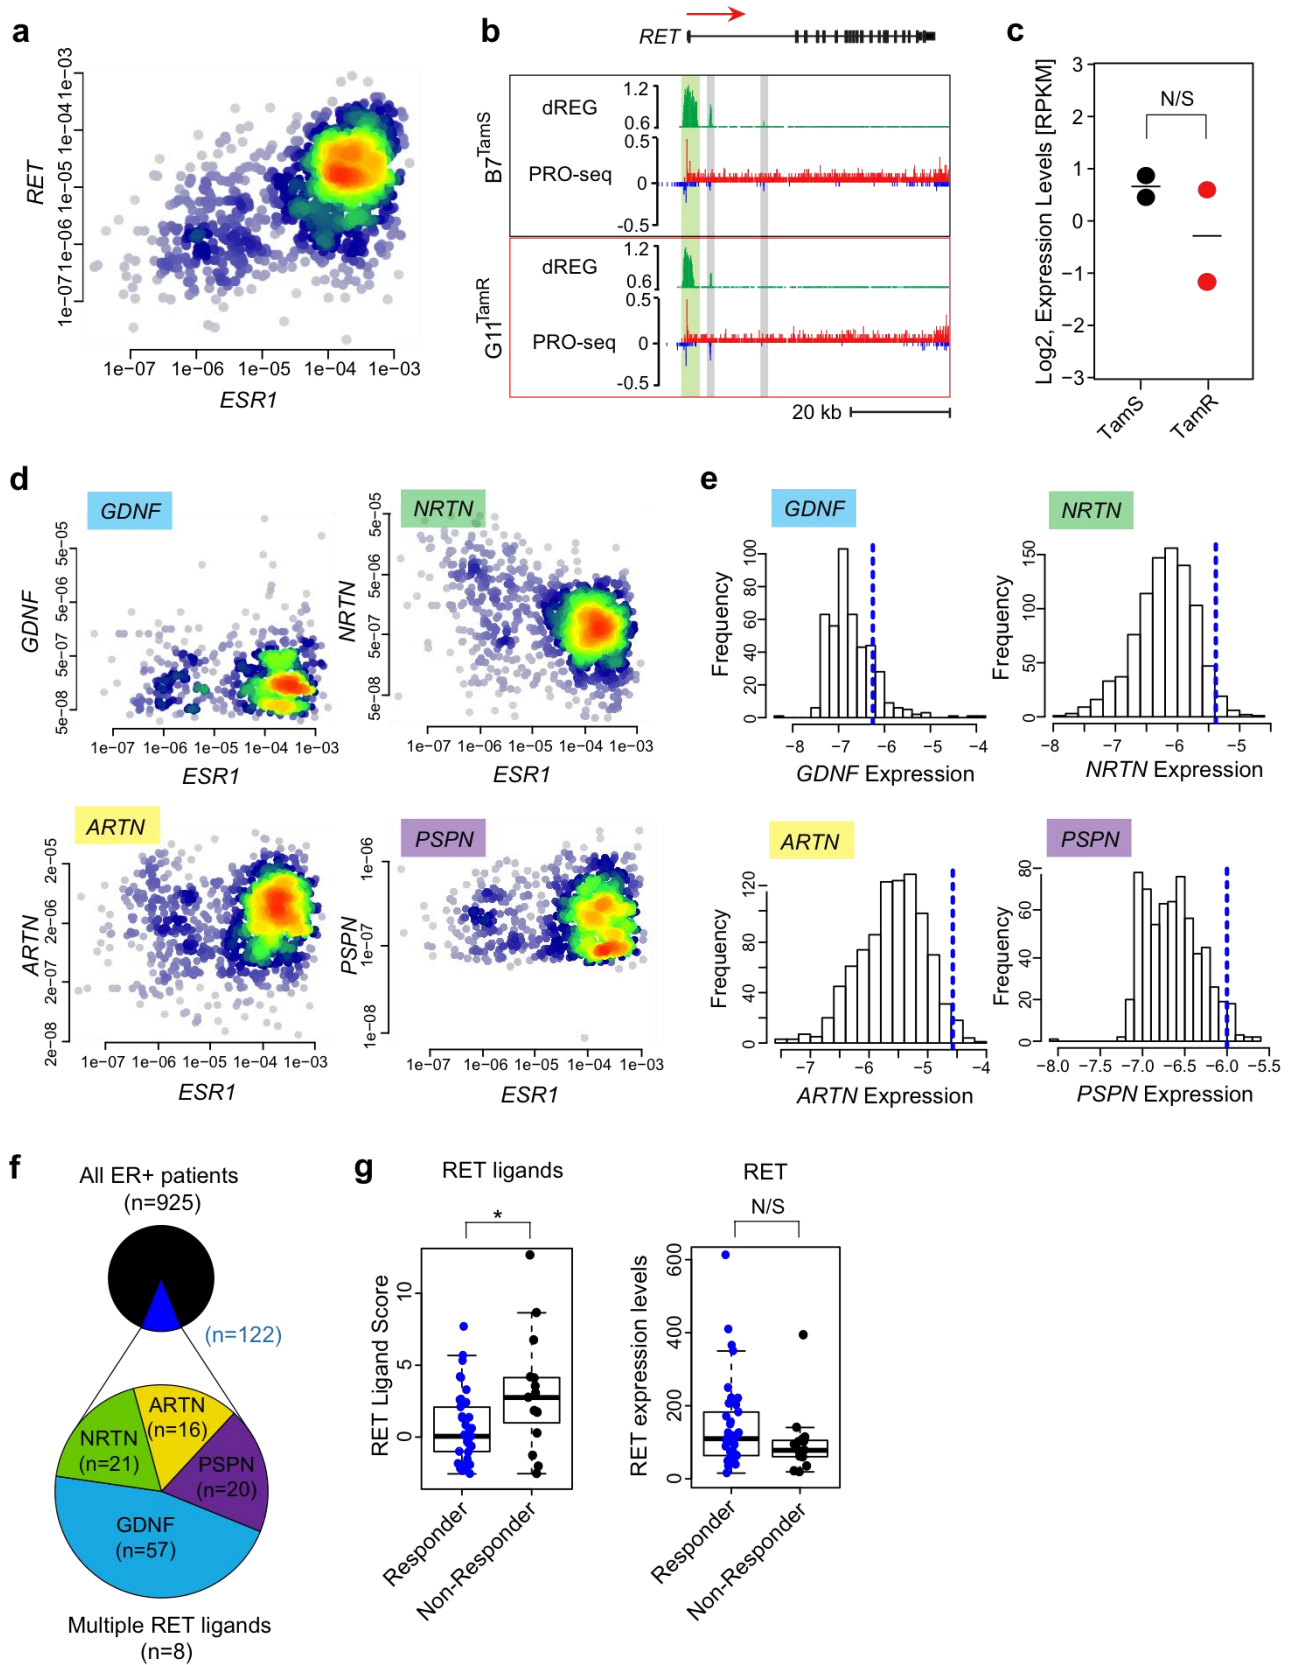

571 **Figure 5. Expression of RET ligands contributes to endocrine resistance.** (a) Density  
572 scatterplot showing *RET* and *ESR1* expression in mRNA-seq data from 1,177 primary breast  
573 cancer models in the cancer genome atlas (TCGA). Spearman's  $\rho = 0.51$ ,  $p = 1.2e-60$ . (b)  
574 Transcription near the *RET* locus in B7<sup>TamS</sup> and G11<sup>TamR</sup> cells. PRO-seq densities on sense  
575 strand and anti-sense strand are shown in red and blue, respectively. dREG scores are shown  
576 in green. Enhancers and promoters are shown in grey and light green shading, respectively.  
577 Arrow indicates the directional movement of transcribed genes. (c) Dot plot shows *RET*  
578 transcription levels in TamS and TamR MCF-7 cells. (d) Density scatterplots show the  
579 expression of RET ligands (*GDNF*, *NRTN*, *ARTN*, and *PSPN*) versus *ESR1* based on mRNA-  
580 seq data from 1,177 primary breast cancers. (e) RET ligand expression distribution in ER+  
581 breast cancers. The dotted blue line represents 2.5 times the range between the 25<sup>th</sup> and 50<sup>th</sup>  
582 percentile. (f) Fraction of ER+ breast cancers (n = 925) with at least one RET ligand exceeding  
583 the threshold shown in panel E (shown in dark blue, n = 122). Among the 4 RET ligands, *GDNF*  
584 was the most highly expressed (n = 60). (g) Boxplots show RET ligands score and RET  
585 expression levels in patients that respond or do not respond to aromatase inhibitor letrozole. \*  $p$   
586 = 0.016.  
587

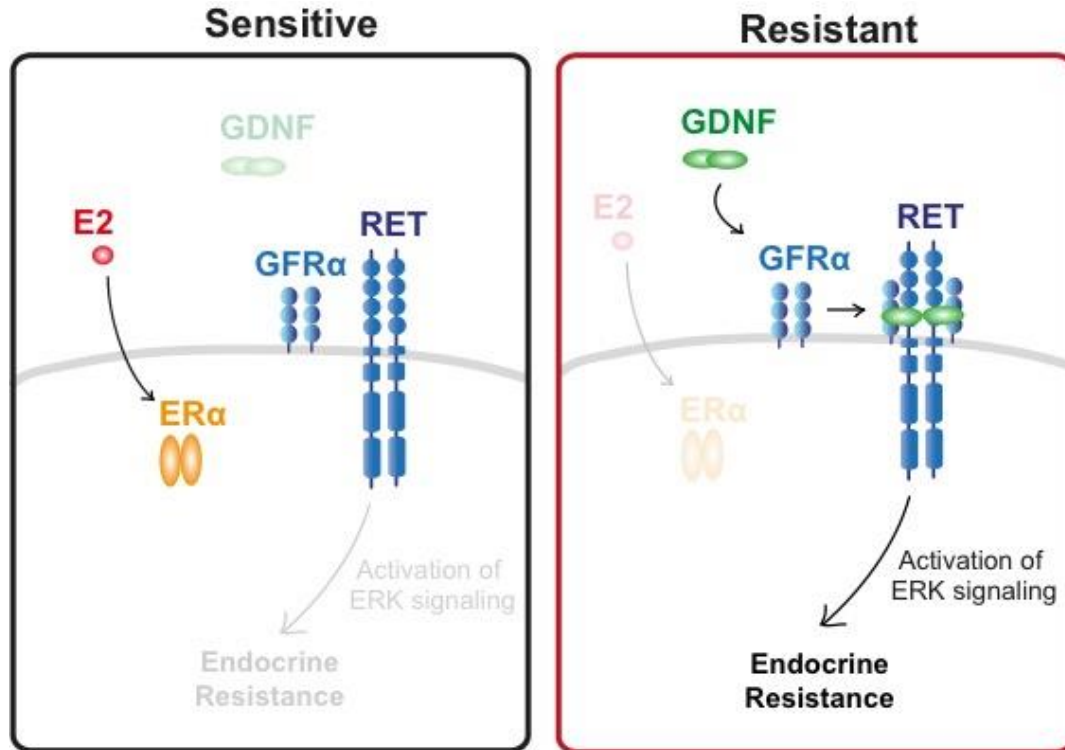

588  
589

590 **Figure 6. Schematic diagram of RET activation in endocrine sensitive and resistant**  
591 **tumors.** Both endocrine sensitive and resistant breast cancer cells express all components of  
592 the RET signaling pathway, but endocrine sensitive breast cancer cells lack GDNF to initiate the  
593 resistance pathway.



594 **References**

- 595 1. Shiau, A. K. *et al.* The structural basis of estrogen receptor/coactivator recognition and  
596 the antagonism of this interaction by tamoxifen. *Cell* **95**, 927–37 (1998).
- 597 2. Wakeling, A. E. Similarities and distinctions in the mode of action of different classes of  
598 antioestrogens. *Endocr. Relat. Cancer* **7**, 17–28 (2000).
- 599 3. Musgrove, E. A. & Sutherland, R. L. Biological determinants of endocrine resistance in  
600 breast cancer. *Nat. Rev. Cancer* **9**, 631–643 (2009).
- 601 4. Ma, C. X., Sanchez, C. G. & Ellis, M. J. Predicting endocrine therapy responsiveness in  
602 breast cancer. *Oncology (Williston Park)*. **23**, 133–42 (2009).
- 603 5. Gattelli, A. *et al.* Ret inhibition decreases growth and metastatic potential of estrogen  
604 receptor positive breast cancer cells. *EMBO Mol. Med.* **5**, 1335–50 (2013).
- 605 6. Morandi, A. *et al.* GDNF-RET signaling in ER-positive breast cancers is a key  
606 determinant of response and resistance to aromatase inhibitors. *Cancer Res.* **73**, 3783–  
607 95 (2013).
- 608 7. Plaza-Menacho, I. *et al.* Targeting the receptor tyrosine kinase RET sensitizes breast  
609 cancer cells to tamoxifen treatment and reveals a role for RET in endocrine resistance.  
610 *Oncogene* **29**, 4648–57 (2010).
- 611 8. Andreucci, E. *et al.* Targeting the receptor tyrosine kinase RET in combination with  
612 aromatase inhibitors in ER positive breast cancer xenografts. *Oncotarget* **7**, 80543–  
613 80553 (2016).
- 614 9. Gonzalez-Malerva, L. *et al.* High-throughput ectopic expression screen for tamoxifen  
615 resistance identifies an atypical kinase that blocks autophagy. *Proc. Natl. Acad. Sci. U. S.*  
616 *A.* **108**, 2058–63 (2011).
- 617 10. Kim, T.-K. *et al.* Widespread transcription at neuronal activity-regulated enhancers.  
618 *Nature* **465**, 182–7 (2010).
- 619 11. Hah, N., Murakami, S., Nagari, A., Danko, C. & Kraus, W. L. Enhancer Transcripts Mark



- 620 Active Estrogen Receptor Binding Sites. *Genome Res.* (2013).  
621 doi:10.1101/gr.152306.112
- 622 12. Core, L. J. *et al.* Analysis of transcription start sites from nascent RNA supports a unified  
623 architecture of mammalian promoters and enhancers. *Nat. Genet.* **In Press**, (2014).
- 624 13. Danko, C. G. *et al.* Identification of active transcriptional regulatory elements from GRO-  
625 seq data. *Nat. Methods* **advance on**, (2015).
- 626 14. Andersson, R. *et al.* An atlas of active enhancers across human cell types and tissues.  
627 *Nature* **507**, 455–461 (2014).
- 628 15. Scruggs, B. S. *et al.* Bidirectional Transcription Arises from Two Distinct Hubs of  
629 Transcription Factor Binding and Active Chromatin. *Mol. Cell* **58**, 1101–1112 (2015).
- 630 16. Coser, K. R. *et al.* Antiestrogen-resistant subclones of MCF-7 human breast cancer cells  
631 are derived from a common monoclonal drug-resistant progenitor. *Proc. Natl. Acad. Sci.*  
632 *U. S. A.* **106**, 14536–41 (2009).
- 633 17. Kwak, H., Fuda, N. J., Core, L. J. & Lis, J. T. Precise maps of RNA polymerase reveal  
634 how promoters direct initiation and pausing. *Science* **339**, 950–3 (2013).
- 635 18. Mahat, D. B. *et al.* Base-pair-resolution genome-wide mapping of active RNA  
636 polymerases using precision nuclear run-on (PRO-seq). *Nat. Protoc.* **11**, 1455–1476  
637 (2016).
- 638 19. Love, M. I., Huber, W. & Anders, S. Moderated estimation of fold change and dispersion  
639 for RNA-seq data with DESeq2. *Genome Biol.* **15**, 550 (2014).
- 640 20. Zhong, Z. *et al.* HOXD13 methylation status is a prognostic indicator in breast cancer. *Int.*  
641 *J. Clin. Exp. Pathol.* **8**, 10716–24 (2015).
- 642 21. Ghousaini, M. *et al.* Evidence that breast cancer risk at the 2q35 locus is mediated  
643 through IGFBP5 regulation. *Nat. Commun.* **4**, 4999 (2014).
- 644 22. Mohammed, H. *et al.* Endogenous purification reveals GREB1 as a key estrogen receptor  
645 regulatory factor. *Cell Rep.* **3**, 342–9 (2013).

- 646 23. Essegir, S. *et al.* A Role for Glial Cell Derived Neurotrophic Factor Induced Expression  
647 by Inflammatory Cytokines and RET/GFR 1 Receptor Up-regulation in Breast Cancer.  
648 *Cancer Res.* **67**, 11732–11741 (2007).
- 649 24. Hah, N. *et al.* A rapid, extensive, and transient transcriptional response to estrogen  
650 signaling in breast cancer cells. *Cell* **145**, 622–34 (2011).
- 651 25. Azofeifa, J. G. & Dowell, R. D. A generative model for the behavior of RNA polymerase.  
652 *Bioinformatics* btw599 (2016). doi:10.1093/bioinformatics/btw599
- 653 26. Wang, Z., Martins, A. L. & Danko, C. G. RTFBSDB: an integrated framework for  
654 transcription factor binding site analysis. *Bioinformatics* btw338 (2016).  
655 doi:10.1093/bioinformatics/btw338
- 656 27. Mohammed, H. *et al.* Progesterone receptor modulates ER $\alpha$  action in breast cancer.  
657 *Nature* **523**, 313–7 (2015).
- 658 28. Welboren, W.-J. *et al.* ChIP-Seq of ER $\alpha$  and RNA polymerase II defines genes  
659 differentially responding to ligands. *EMBO J.* **28**, 1418–28 (2009).
- 660 29. Danko, C. G. *et al.* Signaling Pathways Differentially Affect RNA Polymerase II Initiation,  
661 Pausing, and Elongation Rate in Cells. *Mol. Cell* **50**, 212–222 (2013).
- 662 30. Benz, C. C. *et al.* Estrogen-dependent, tamoxifen-resistant tumorigenic growth of MCF-7  
663 cells transfected with HER2/neu. *Breast Cancer Res. Treat.* **24**, 85–95 (1992).
- 664 31. Sariola, H. & Saarma, M. Novel functions and signalling pathways for GDNF. *J. Cell Sci.*  
665 **116**, (2003).
- 666 32. Miller, W. R., Larionov, A., Anderson, T. J., Evans, D. B. & Dixon, J. M. Sequential  
667 changes in gene expression profiles in breast cancers during treatment with the  
668 aromatase inhibitor, letrozole. *Pharmacogenomics J.* **12**, 10–21 (2012).
- 669 33. Kang, J. *et al.* Artemin is estrogen regulated and mediates antiestrogen resistance in  
670 mammary carcinoma. *Oncogene* **29**, 3228–3240 (2010).
- 671 34. The Cancer Genome Atlas Network. Comprehensive molecular portraits of human breast

- 672            tumours. *Nature* **490**, 61–70 (2012).
- 673    35.    Ciriello, G. *et al.* Comprehensive Molecular Portraits of Invasive Lobular Breast Cancer.  
674            *Cell* **163**, 506–519 (2015).
- 675    36.    Zhou, Y. *et al.* Activation of nuclear factor- $\kappa$ B (NF $\kappa$ B) identifies a high-risk subset of  
676            hormone-dependent breast cancers. *Int. J. Biochem. Cell Biol.* **37**, 1130–1144 (2005).
- 677    37.    Franco, H. L., Nagari, A. & Kraus, W. L. TNF $\alpha$  Signaling Exposes Latent Estrogen  
678            Receptor Binding Sites to Alter the Breast Cancer Cell Transcriptome. *Mol. Cell* **58**, 21–  
679            34 (2015).
- 680    38.    Core, L. J., Waterfall, J. J. & Lis, J. T. Nascent RNA sequencing reveals widespread  
681            pausing and divergent initiation at human promoters. *Science (80-. )*. **322**, 1845–1848  
682            (2008).
- 683    39.    Martin, M. Cutadapt removes adapter sequences from high-throughput sequencing reads.  
684            *EMBnet.journal* **17**, 10–12 (2011).
- 685    40.    Li, H. & Durbin, R. Fast and accurate short read alignment with Burrows-Wheeler  
686            transform. *Bioinformatics* **25**, 1754–60 (2009).
- 687    41.    Quinlan, A. R. & Hall, I. M. BEDTools: a flexible suite of utilities for comparing genomic  
688            features. *Bioinformatics* **26**, 841–2 (2010).
- 689    42.    Kuhn, R. M., Haussler, D. & Kent, W. J. The UCSC genome browser and associated  
690            tools. *Brief. Bioinform.* **14**, 144–161 (2013).
- 691    43.    Team, R. D. C. R: A language and environment for statistical computing. In R Foundation  
692            for Statistical Computing. (2010).
- 693    44.    Prenzel, T. *et al.* Estrogen-Dependent Gene Transcription in Human Breast Cancer Cells  
694            Relies upon Proteasome-Dependent Monoubiquitination of Histone H2B. *Cancer Res.* **71**,  
695            5739–5753 (2011).
- 696    45.    Boulay, A. *et al.* The Ret Receptor Tyrosine Kinase Pathway Functionally Interacts with  
697            the ER Pathway in Breast Cancer. *Cancer Res.* **68**, 3743–3751 (2008).
